# Supplementary material for: Plasma C-Terminal Agrin Fragment as an Early Biomarker for Sarcopenia: Results From the GenoFit Study
Source: PubMed Central journal article supplement (PMC8599080; doi:10.1093/gerona/glab139), 2021-05-16
Supplement: glab139_suppl_supplementary_materials.pdf [file glab139_suppl_supplementary_materials.pdf]

**ONLINE-ONLY MATERIAL**

**eTable 1. Participant characteristics according to the presence of sarcopenia**

|                                         | Sarcopenia (N=31) | No Sarcopenia (N=269) | P-value |
|-----------------------------------------|-------------------|-----------------------|---------|
| <b>Sociodemographic characteristics</b> |                   |                       |         |
| Age (years)                             | 66.4 ± 10.4       | 63.8 ± 8.2            | 0.110   |
| Sex                                     |                   |                       |         |
| Male, n (%)                             | 14 (9.3)          | 136 (90.7)            | 0.571   |
| Female, n (%)                           | 17 (11.3)         | 133 (88.7)            |         |
| <b>Anthropometric characteristics</b>   |                   |                       |         |
| Height (cm)                             | 164.3 ± 9.6       | 169 ± 9.6             | 0.011   |
| Body mass (kg)                          | 63.9 ± 11         | 75.8 ± 13.6           | <0.001  |
| BMI (kg/m <sup>2</sup> )                | 23.6 ± 3.4        | 26.4 ± 3.5            | <0.001  |
| <b>Plasma biomarkers</b>                |                   |                       |         |
| CAF (ng/ml)                             | 3.1 ± 1.4         | 2.7 ± 0.5             | <0.001  |
| <b>Sarcopenic phenotypes</b>            |                   |                       |         |
| ALM (kg)                                | 17.7 ± 4          | 22.1 ± 5.4            | <0.001  |
| Grip strength (kg)                      | 22.5 ± 6.5        | 34.9 ± 11.4           | <0.001  |

BMI = body mass index; CAF = C-terminal agrin fragment; ALM = Appendicular lean mass

**eTable 2. Multiple regression examining the association between: 1) ALM and CAF; and 2) Grip strength and CAF**

| Variables                        | Unstandardised coefficients | 95% CI          | P-value | R <sup>2</sup> |
|----------------------------------|-----------------------------|-----------------|---------|----------------|
| <b>ALM<sup>a</sup></b>           |                             |                 |         |                |
| CAF                              | -0.495                      | -0.935 - -0.055 | 0.028   | 0.801          |
| <b>Grip strength<sup>a</sup></b> |                             |                 |         |                |
| CAF                              | -0.394                      | -1.774 - 0.986  | 0.575   | 0.564          |

<sup>a</sup> = adjusted for sex, age and body mass index; N = 300; Dependent variables: model 1 = ALM, model 2 = Grip strength; Adjusted R<sup>2</sup>: model 1 = 0.798, model 2 = 0.558; ALM = Appendicular lean mass; CAF = C-terminal agrin fragment

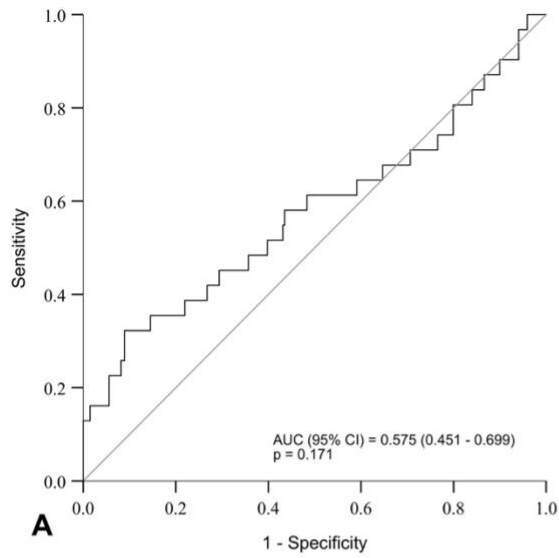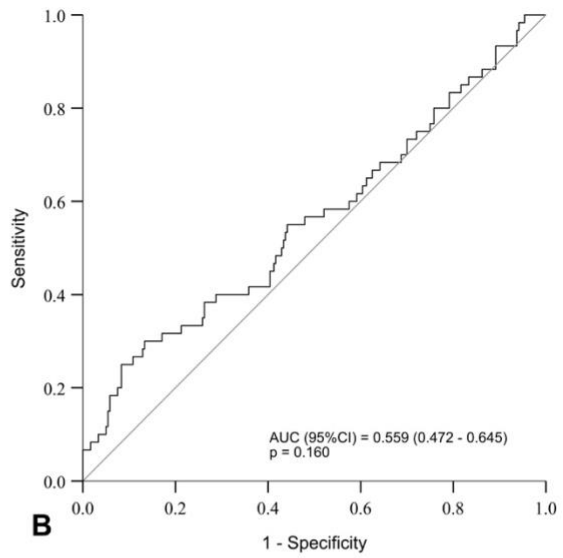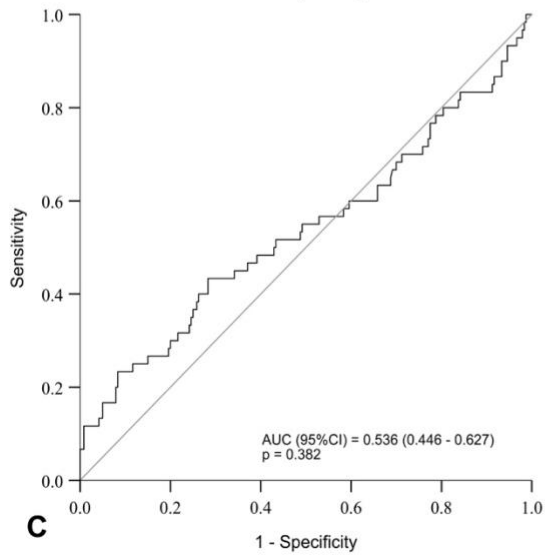

**eFigure 1. Receiver operating characteristic analysis of C-terminal agrin fragment for: A) Sarcopenia; B) Low grip strength; and C) Low appendicular lean mass**
